# Supplementary material for: Pharmaceutical Contaminants in Wastewater and Receiving Water Bodies of South Africa: A Review of Sources, Pathways, Occurrence, Effects, and Geographical Distribution
Source: MDPI journal article supplement (doi:10.3390/w16060796), 2024-03-07
Supplement: s1 [file s1]

[illegible]
